# Supplementary material
Source: PubMed Central journal article supplement (PMC10012323)
Supplement: 296_2023_5304_MOESM1_ESM.pdf [file 296_2023_5304_MOESM1_ESM.pdf]

For use by Ahmed Masood only. Received from Mind Garden, Inc. on July 4, 2021

**Permission for Ahmed Masood to reproduce 150 copies  
within three years of July 4, 2021**

## **Maslach Burnout Inventory™**

### **Instruments and Scoring Keys**

#### **Includes MBI Forms:**

**Human Services - MBI-HSS**

**Medical Personnel - MBI-HSS (MP)**

**Educators - MBI-ES**

**General - MBI-GS**

**Students - MBI-GS (S)**

Christina Maslach  
Susan E. Jackson  
Michael P. Leiter  
Wilmar B. Schaufeli  
Richard L. Schwab

**Published by Mind Garden, Inc.**

info@mindgarden.com  
www.mindgarden.com

### **Important Note to Licensee**

If you have purchased a license to reproduce or administer a fixed number of copies of an existing Mind Garden instrument, manual, or workbook, you agree that it is your legal responsibility to compensate the copyright holder of this work — via payment to Mind Garden — for reproduction or administration in any medium. **Reproduction includes all forms of physical or electronic administration including online survey, handheld survey devices, etc.**

The copyright holder has agreed to grant a license to reproduce the specified number of copies of this document or instrument **within one year from the date of purchase.**

**You agree that you or a person in your organization will be assigned to track the number of reproductions or administrations and will be responsible for compensating Mind Garden for any reproductions or administrations in excess of the number purchased.**

*This instrument is covered by U.S. and international copyright laws. Any use of this instrument, in whole or in part, is subject to such laws and is expressly prohibited by the copyright holder. If you would like to request permission to use or reproduce the instrument, in whole or in part, contact Mind Garden, Inc.*

## MBI Human Services Survey

Christina Maslach & Susan E. Jackson

*The purpose of this survey is to discover how various people working in human services or the helping professions view their job and the people with whom they work closely.*

Because people in a wide variety of occupations will answer this survey, it uses the term *recipients* to refer to the people for whom you provide your service, care, treatment, or instruction. When answering this survey please think of these people as recipients of the service you provide, even though you may use another term in your work.

**Instructions:** On the following page are 22 statements of job-related feelings. Please read each statement carefully and decide if you ever feel this way about *your* job. If you have *never* had this feeling, write the number "0" (zero) in the space before the statement. If you have had this feeling, indicate *how often* you feel it by writing the number (from 1 to 6) that best describes how frequently you feel that way. An example is shown below.

### Example:

---

| How often: | 0     | 1                          | 2                    | 3                   | 4           | 5                  | 6         |
|------------|-------|----------------------------|----------------------|---------------------|-------------|--------------------|-----------|
|            | Never | A few times a year or less | Once a month or less | A few times a month | Once a week | A few times a week | Every day |

---

How often  
0-6

Statement:

---

1. \_\_\_\_\_ I feel depressed at work.

If you never feel depressed at work, you would write the number "0" (zero) under the heading "How often." If you rarely feel depressed at work (a few times a year or less), you would write the number "1." If your feelings of depression are fairly frequent (a few times a week but not daily), you would write the number "5."

## MBI Human Services Survey

---

| How often: | 0     | 1                          | 2                    | 3                   | 4           | 5                  | 6         |
|------------|-------|----------------------------|----------------------|---------------------|-------------|--------------------|-----------|
|            | Never | A few times a year or less | Once a month or less | A few times a month | Once a week | A few times a week | Every day |

---

| How often<br>0-6 | Statements:                                                                           |
|------------------|---------------------------------------------------------------------------------------|
| 1. _____         | I feel emotionally drained from my work.                                              |
| 2. _____         | I feel used up at the end of the workday.                                             |
| 3. _____         | I feel fatigued when I get up in the morning and have to face another day on the job. |
| 4. _____         | I can easily understand how my recipients feel about things.                          |
| 5. _____         | I feel I treat some recipients as if they were impersonal objects.                    |
| 6. _____         | Working with people all day is really a strain for me.                                |
| 7. _____         | I deal very effectively with the problems of my recipients.                           |
| 8. _____         | I feel burned out from my work.                                                       |
| 9. _____         | I feel I'm positively influencing other people's lives through my work.               |
| 10. _____        | I've become more callous toward people since I took this job.                         |
| 11. _____        | I worry that this job is hardening me emotionally.                                    |
| 12. _____        | I feel very energetic.                                                                |
| 13. _____        | I feel frustrated by my job.                                                          |
| 14. _____        | I feel I'm working too hard on my job.                                                |
| 15. _____        | I don't really care what happens to some recipients.                                  |
| 16. _____        | Working with people directly puts too much stress on me.                              |
| 17. _____        | I can easily create a relaxed atmosphere with my recipients.                          |
| 18. _____        | I feel exhilarated after working closely with my recipients.                          |
| 19. _____        | I have accomplished many worthwhile things in this job.                               |
| 20. _____        | I feel like I'm at the end of my rope.                                                |
| 21. _____        | In my work, I deal with emotional problems very calmly.                               |
| 22. _____        | I feel recipients blame me for some of their problems.                                |

---

(Administrative use only)

EE Total score: \_\_\_\_\_

DP Total score: \_\_\_\_\_

PA Total score: \_\_\_\_\_

EE Average score: \_\_\_\_\_

DP Average score: \_\_\_\_\_

PA Average score: \_\_\_\_\_

## MBI Human Services Survey for Medical Personnel

Christina Maslach & Susan E. Jackson

*The purpose of this survey is to discover how various people in the human services or the helping professions view their job and the people with whom they work closely.*

**Instructions:** On the following page are 22 statements of job-related feelings. Please read each statement carefully and decide if you ever feel this way about *your* job. If you have *never* had this feeling, write the number "0" (zero) in the space before the statement. If you have had this feeling, indicate *how often* you feel it by writing the number (from 1 to 6) that best describes how frequently you feel that way. An example is shown below.

**Example:**

---

| How often: | 0     | 1                          | 2                    | 3                   | 4           | 5                  | 6         |
|------------|-------|----------------------------|----------------------|---------------------|-------------|--------------------|-----------|
|            | Never | A few times a year or less | Once a month or less | A few times a month | Once a week | A few times a week | Every day |

---

How often  
0-6

Statement:

---

1. \_\_\_\_\_ I feel depressed at work.

If you never feel depressed at work, you would write the number "0" (zero) under the heading "How often." If you rarely feel depressed at work (a few times a year or less), you would write the number "1." If your feelings of depression are fairly frequent (a few times a week but not daily), you would write the number "5."

## MBI Human Services Survey for Medical Personnel

| How often: | 0     | 1                          | 2                    | 3                   | 4           | 5                  | 6         |
|------------|-------|----------------------------|----------------------|---------------------|-------------|--------------------|-----------|
|            | Never | A few times a year or less | Once a month or less | A few times a month | Once a week | A few times a week | Every day |

| How often<br>0-6 | Statements:                                                                           |
|------------------|---------------------------------------------------------------------------------------|
| 1. _____         | I feel emotionally drained from my work.                                              |
| 2. _____         | I feel used up at the end of the workday.                                             |
| 3. _____         | I feel fatigued when I get up in the morning and have to face another day on the job. |
| 4. _____         | I can easily understand how my patients feel about things.                            |
| 5. _____         | I feel I treat some patients as if they were impersonal objects.                      |
| 6. _____         | Working with people all day is really a strain for me.                                |
| 7. _____         | I deal very effectively with the problems of my patients.                             |
| 8. _____         | I feel burned out from my work.                                                       |
| 9. _____         | I feel I'm positively influencing other people's lives through my work.               |
| 10. _____        | I've become more callous toward people since I took this job.                         |
| 11. _____        | I worry that this job is hardening me emotionally.                                    |
| 12. _____        | I feel very energetic.                                                                |
| 13. _____        | I feel frustrated by my job.                                                          |
| 14. _____        | I feel I'm working too hard on my job.                                                |
| 15. _____        | I don't really care what happens to some patients.                                    |
| 16. _____        | Working with people directly puts too much stress on me.                              |
| 17. _____        | I can easily create a relaxed atmosphere with my patients.                            |
| 18. _____        | I feel exhilarated after working closely with my patients.                            |
| 19. _____        | I have accomplished many worthwhile things in this job.                               |
| 20. _____        | I feel like I'm at the end of my rope.                                                |
| 21. _____        | In my work, I deal with emotional problems very calmly.                               |
| 22. _____        | I feel patients blame me for some of their problems.                                  |

(Administrative use only)

EE Total score: \_\_\_\_\_ DP Total score: \_\_\_\_\_ PA Total score: \_\_\_\_\_  
 EE Average score: \_\_\_\_\_ DP Average score: \_\_\_\_\_ PA Average score: \_\_\_\_\_

## MBI for Educators Survey

Christina Maslach, Susan E. Jackson & Richard L. Schwab

*The purpose of this survey is to discover how educators view their job and the people with whom they work closely.*

**Instructions:** On the following page are 22 statements of job-related feelings. Please read each statement carefully and decide if you ever feel this way about *your* job. If you have *never* had this feeling, write the number “0” (zero) in the space before the statement. If you have had this feeling, indicate *how often* you feel it by writing the number (from 1 to 6) that best describes how frequently you feel that way. An example is shown below.

---

| How often: | 0     | 1                          | 2                    | 3                   | 4           | 5                  | 6         |
|------------|-------|----------------------------|----------------------|---------------------|-------------|--------------------|-----------|
|            | Never | A few times a year or less | Once a month or less | A few times a month | Once a week | A few times a week | Every day |

---

### Example:

How often  
0-6

Statement:

---

1. \_\_\_\_\_ I feel depressed at work.

If you never feel depressed at work, you would write the number “0” (zero) under the heading “How often.” If you rarely feel depressed at work (a few times a year or less), you would write the number “1.” If your feelings of depression are fairly frequent (a few times a week but not daily), you would write the number “5.”

## MBI for Educators Survey

---

| How often: | 0     | 1                          | 2                    | 3                   | 4           | 5                  | 6         |
|------------|-------|----------------------------|----------------------|---------------------|-------------|--------------------|-----------|
|            | Never | A few times a year or less | Once a month or less | A few times a month | Once a week | A few times a week | Every day |

---

How often  
0-6

Statements:

1. \_\_\_\_\_ I feel emotionally drained from my work.
2. \_\_\_\_\_ I feel used up at the end of the workday.
3. \_\_\_\_\_ I feel fatigued when I get up in the morning and have to face another day on the job.
4. \_\_\_\_\_ I can easily understand how my students feel about things.
5. \_\_\_\_\_ I feel I treat some students as if they were impersonal objects.
6. \_\_\_\_\_ Working with people all day is really a strain for me.
7. \_\_\_\_\_ I deal very effectively with the problems of my students.
8. \_\_\_\_\_ I feel burned out from my work.
9. \_\_\_\_\_ I feel I'm positively influencing other people's lives through my work.
10. \_\_\_\_\_ I've become more callous toward people since I took this job.
11. \_\_\_\_\_ I worry that this job is hardening me emotionally.
12. \_\_\_\_\_ I feel very energetic.
13. \_\_\_\_\_ I feel frustrated by my job.
14. \_\_\_\_\_ I feel I'm working too hard on my job.
15. \_\_\_\_\_ I don't really care what happens to some students.
16. \_\_\_\_\_ Working with people directly puts too much stress on me.
17. \_\_\_\_\_ I can easily create a relaxed atmosphere with my students.
18. \_\_\_\_\_ I feel exhilarated after working closely with my students.
19. \_\_\_\_\_ I have accomplished many worthwhile things in this job.
20. \_\_\_\_\_ I feel like I'm at the end of my rope.
21. \_\_\_\_\_ In my work, I deal with emotional problems very calmly.
22. \_\_\_\_\_ I feel students blame me for some of their problems.

---

(Administrative use only)

EE Total score: \_\_\_\_\_

DP Total score: \_\_\_\_\_

PA Total score: \_\_\_\_\_

EE Average score: \_\_\_\_\_

DP Average score: \_\_\_\_\_

PA Average score: \_\_\_\_\_

## MBI – Human Services, Medical Personnel, and Educators Scoring Key Emotional Exhaustion (EE) Subscale

**Directions:** Line up this scoring key with the MBI survey form. Sum the survey responses on EE items # 1, 2, 3, 6, 8, 13, 14, 16, and 20 that correspond to the unshaded areas on this scoring key. Enter this EE total score on the survey form. Divide the EE total score by the number of answered EE items for an EE average score. Research usually reports the average score.

| How Often<br>0-6 |
|------------------|
| 1. _____         |
| 2. _____         |
| 3. _____         |
| 4. _____         |
| 5. _____         |
| 6. _____         |
| 7. _____         |
| 8. _____         |
| 9. _____         |
| 10. _____        |
| 11. _____        |
| 12. _____        |
| 13. _____        |
| 14. _____        |
| 15. _____        |
| 16. _____        |
| 17. _____        |
| 18. _____        |
| 19. _____        |
| 20. _____        |
| 21. _____        |
| 22. _____        |

**MBI - Human Services Survey - MBI-HSS:** Copyright ©1981 Christina Maslach & Susan E. Jackson.

**MBI - Human Services Survey for Medical Personnel - MBI-HSS (MP):** Copyright ©1981, 2016 by Christina Maslach & Susan E. Jackson.

**MBI - Educators Survey - MBI-ES:** Copyright ©1986 Christina Maslach, Susan E. Jackson & Richard L. Schwab. All rights reserved in all media. Published by Mind Garden, Inc., [www.mindgarden.com](http://www.mindgarden.com)



## MBI – Human Services, Medical Personnel, and Educators Scoring Key Depersonalization (DP) Subscale

**Directions:** Line up this scoring key with the MBI survey form. Sum the survey responses on DP items # 5, 10, 11, 15, and 22 that correspond to the unshaded areas on this scoring key. Enter this DP total score on the survey form. Divide the DP total score by the number of answered DP items for a DP average score. Research usually reports the average score.

| How Often<br>0-6 |
|------------------|
| 1. _____         |
| 2. _____         |
| 3. _____         |
| 4. _____         |
| 5. _____         |
| 6. _____         |
| 7. _____         |
| 8. _____         |
| 9. _____         |
| 10. _____        |
| 11. _____        |
| 12. _____        |
| 13. _____        |
| 14. _____        |
| 15. _____        |
| 16. _____        |
| 17. _____        |
| 18. _____        |
| 19. _____        |
| 20. _____        |
| 21. _____        |
| 22. _____        |

**MBI – Human Services Survey - MBI-HSS:** Copyright ©1981 Christina Maslach & Susan E. Jackson.

**MBI - Human Services Survey for Medical Personnel - MBI-HSS (MP):** Copyright ©1981, 2016 by Christina Maslach & Susan E. Jackson.

**MBI - Educators Survey - MBI-ES:** Copyright ©1986 Christina Maslach, Susan E. Jackson & Richard L. Schwab. All rights reserved in all media. Published by Mind Garden, Inc., [www.mindgarden.com](http://www.mindgarden.com)

## MBI – Human Services, Medical Personnel, and Educators Scoring Key Personal Accomplishment (PA) Subscale

**Directions:** Line up this scoring key with the MBI survey form. Sum the survey responses on PA items # 4, 7, 9, 12, 17, 18, 19, and 21 that correspond to the unshaded areas on this scoring key. Enter this PA total score on the survey form. Divide the PA total score by the number of answered PA items for a PA average score. Research usually reports the average score.

| How Often<br>0-6 |
|------------------|
| 1. _____         |
| 2. _____         |
| 3. _____         |
| 4. _____         |
| 5. _____         |
| 6. _____         |
| 7. _____         |
| 8. _____         |
| 9. _____         |
| 10. _____        |
| 11. _____        |
| 12. _____        |
| 13. _____        |
| 14. _____        |
| 15. _____        |
| 16. _____        |
| 17. _____        |
| 18. _____        |
| 19. _____        |
| 20. _____        |
| 21. _____        |
| 22. _____        |

**MBI – Human Services Survey - MBI-HSS:** Copyright ©1981 Christina Maslach & Susan E. Jackson.

**MBI - Human Services Survey for Medical Personnel - MBI-HSS (MP):** Copyright ©1981, 2016 by Christina Maslach & Susan E. Jackson.

**MBI - Educators Survey - MBI-ES:** Copyright ©1986 Christina Maslach, Susan E. Jackson & Richard L. Schwab. All rights reserved in all media. Published by Mind Garden, Inc., [www.mindgarden.com](http://www.mindgarden.com)

## MBI - General Survey

Wilmar B. Schaufeli, Michael P. Leiter, Christina Maslach & Susan E. Jackson

*The purpose of this survey is to discover how staff members view their job, and their reactions to their work.*

**Instructions:** On the following page are 16 statements of job-related feelings. Please read each statement carefully and decide if you ever feel this way about *your* job. If you have *never* had this feeling, write the number “0” (zero) in the space before the statement. If you have had this feeling, indicate *how often* you feel it by writing the number (from 1 to 6) that best describes how frequently you feel that way. An example is shown below.

### Example:

---

| How often: | 0     | 1                          | 2                    | 3                   | 4           | 5                  | 6         |
|------------|-------|----------------------------|----------------------|---------------------|-------------|--------------------|-----------|
|            | Never | A few times a year or less | Once a month or less | A few times a month | Once a week | A few times a week | Every day |

---

How often  
0-6

Statement:

---

1. \_\_\_\_\_ I feel depressed at work.

If you never feel depressed at work, you would write the number “0” (zero) under the heading “How often.” If you rarely feel depressed at work (a few times a year or less), you would write the number “1.” If your feelings of depression are fairly frequent (a few times a week but not daily), you would write the number “5.”

## MBI - General Survey

---

| How often: | 0     | 1                          | 2                    | 3                   | 4           | 5                  | 6         |
|------------|-------|----------------------------|----------------------|---------------------|-------------|--------------------|-----------|
|            | Never | A few times a year or less | Once a month or less | A few times a month | Once a week | A few times a week | Every day |

---

How often  
0-6

Statements:

- 
1. \_\_\_\_\_ I feel emotionally drained from my work.
  2. \_\_\_\_\_ I feel used up at the end of the workday.
  3. \_\_\_\_\_ I feel tired when I get up in the morning and have to face another day on the job.
  4. \_\_\_\_\_ Working all day is really a strain for me.
  5. \_\_\_\_\_ I can effectively solve the problems that arise in my work.
  6. \_\_\_\_\_ I feel burned out from my work.
  7. \_\_\_\_\_ I feel I am making an effective contribution to what this organization does.
  8. \_\_\_\_\_ I have become less interested in my work since I started this job.
  9. \_\_\_\_\_ I have become less enthusiastic about my work.
  10. \_\_\_\_\_ In my opinion, I am good at my job.
  11. \_\_\_\_\_ I feel exhilarated when I accomplish something at work.
  12. \_\_\_\_\_ I have accomplished many worthwhile things in this job.
  13. \_\_\_\_\_ I just want to do my job and not be bothered.
  14. \_\_\_\_\_ I have become more cynical about whether my work contributes anything.
  15. \_\_\_\_\_ I doubt the significance of my work.
  16. \_\_\_\_\_ At my work, I feel confident that I am effective at getting things done.
- 

(Administrative use only)

EX Total score: \_\_\_\_\_

CY Total score: \_\_\_\_\_

PE Total score: \_\_\_\_\_

EX Average score: \_\_\_\_\_

CY Average score: \_\_\_\_\_

PE Average score: \_\_\_\_\_

## MBI - General Survey for Students

Wilmar B. Schaufeli, Michael P. Leiter, Christina Maslach & Susan E. Jackson

*The purpose of this survey is to discover how university students view their studies, and their reactions to their academic work.*

**Instructions:** On the following page are 16 statements of university-related feelings. Please read each statement carefully and decide if you ever feel this way about *your* academic work. If you have *never* had this feeling, write the number “0” (zero) in the space before the statement. If you have had this feeling, indicate *how often* you feel it by writing the number (from 1 to 6) that best describes how frequently you feel that way. An example is shown below.

### Example:

---

| How often: | 0     | 1                          | 2                    | 3                   | 4           | 5                  | 6         |
|------------|-------|----------------------------|----------------------|---------------------|-------------|--------------------|-----------|
|            | Never | A few times a year or less | Once a month or less | A few times a month | Once a week | A few times a week | Every day |

---

| How often<br>0-6 | Statement: |
|------------------|------------|
|------------------|------------|

---

1. \_\_\_\_\_ I feel depressed by my studies.

If you never feel depressed by your studies, you would write the number “0” (zero) under the heading “How often.” If you rarely feel depressed by your studies, (a few times a year or less), you would write the number “1.” If your feelings of being depressed by your studies are fairly frequent (a few times a week but not daily), you would write the number “5.”

## MBI - General Survey for Students

---

| How often: | 0     | 1                          | 2                    | 3                   | 4           | 5                  | 6         |
|------------|-------|----------------------------|----------------------|---------------------|-------------|--------------------|-----------|
|            | Never | A few times a year or less | Once a month or less | A few times a month | Once a week | A few times a week | Every day |

---

How Often  
0-6

Statements:

- 
- \_\_\_\_\_ I feel emotionally drained by my studies.
  - \_\_\_\_\_ I feel used up at the end of the day at the university.
  - \_\_\_\_\_ I feel tired when I get up in the morning and have to face another day at the university.
  - \_\_\_\_\_ Attending classes all day is really a strain for me.
  - \_\_\_\_\_ I can effectively solve the problems that arise in my studies.
  - \_\_\_\_\_ I feel burned out from my studies.
  - \_\_\_\_\_ I feel I am making an effective contribution in class.
  - \_\_\_\_\_ I have become less interested in my studies since my enrollment.
  - \_\_\_\_\_ I have become less enthusiastic about my studies.
  - \_\_\_\_\_ In my opinion, I am a good student.
  - \_\_\_\_\_ I feel exhilarated when I accomplish something at the university.
  - \_\_\_\_\_ I have accomplished many worthwhile things in my studies.
  - \_\_\_\_\_ I just want to get my work done and not be bothered.
  - \_\_\_\_\_ I have become more cynical about whether my university work contributes anything.
  - \_\_\_\_\_ I doubt the significance of my studies.
  - \_\_\_\_\_ While working at the university, I feel confident that I am effective at getting things done.
- 

(Administrative use only)

EX Total score: \_\_\_\_\_

CY Total score: \_\_\_\_\_

PE Total score: \_\_\_\_\_

EX Average score: \_\_\_\_\_

CY Average score: \_\_\_\_\_

PE Average score: \_\_\_\_\_

## MBI – General Survey and General Survey for Students Scoring Key Exhaustion (EX) Subscale

**Directions:** Line up this scoring key with the MBI survey form. Sum the survey responses on EX items # 1, 2, 3, 4, and 6 that correspond to the unshaded areas on this scoring key. Enter this EX total score on the survey form. Divide the EX total score by the number of answered EX items for an EX average score. Research usually reports the average score.

| How Often<br>0-6 |       |
|------------------|-------|
| 1.               | _____ |
| 2.               | _____ |
| 3.               | _____ |
| 4.               | _____ |
| 5.               | _____ |
| 6.               | _____ |
| 7.               | _____ |
| 8.               | _____ |
| 9.               | _____ |
| 10.              | _____ |
| 11.              | _____ |
| 12.              | _____ |
| 13.              | _____ |
| 14.              | _____ |
| 15.              | _____ |
| 16.              | _____ |

**MBI - General Survey – MBI-GS:** Copyright ©1996 Wilmar B. Schaufeli, Michael P. Leiter, Christina Maslach & Susan E. Jackson.

**MBI - General Survey for Students – MBI-GS (S):** Copyright ©1996, 2016 Wilmar B. Schaufeli, Michael P. Leiter, Christina Maslach & Susan E. Jackson.

All rights reserved in all media. Published by Mind Garden, Inc. [www.mindgarden.com](http://www.mindgarden.com).

## MBI – General Survey and General Survey for Students Scoring Key Cynicism (CY) Subscale

**Directions:** Line up this scoring key with the MBI survey form. Sum the survey responses on CY items # 8, 9, 13, 14, and 15 that correspond to the unshaded areas on this scoring key. Enter this CY total score on the survey form. Divide the CY total score by the number of answered CY items for a CY average score. Research usually reports the average score.

| How Often<br>0-6 |
|------------------|
| 1. _____         |
| 2. _____         |
| 3. _____         |
| 4. _____         |
| 5. _____         |
| 6. _____         |
| 7. _____         |
| 8. _____         |
| 9. _____         |
| 10. _____        |
| 11. _____        |
| 12. _____        |
| 13. _____        |
| 14. _____        |
| 15. _____        |
| 16. _____        |

**MBI - General Survey – MBI-GS:** Copyright ©1996 Wilmar B. Schaufeli, Michael P. Leiter, Christina Maslach & Susan E. Jackson.

**MBI - General Survey for Students – MBI-GS (S):** Copyright ©1996, 2016 Wilmar B. Schaufeli, Michael P. Leiter, Christina Maslach & Susan E. Jackson.

All rights reserved in all media. Published by Mind Garden, Inc. [www.mindgarden.com](http://www.mindgarden.com).



## MBI – General Survey and General Survey for Students Scoring Key Professional Efficacy (PE) Subscale

**Directions:** Line up this scoring key with the MBI survey form. Sum the survey responses on PE items # 5, 7, 10, 11, 12, and 16 that correspond to the unshaded areas on this scoring key. Enter this PE total score on the survey form. Divide the PE total score by the number of answered PE items for a PE average score. Research usually reports the average score.

| How Often<br>0-6 |       |
|------------------|-------|
| 1.               | _____ |
| 2.               | _____ |
| 3.               | _____ |
| 4.               | _____ |
| 5.               | _____ |
| 6.               | _____ |
| 7.               | _____ |
| 8.               | _____ |
| 9.               | _____ |
| 10.              | _____ |
| 11.              | _____ |
| 12.              | _____ |
| 13.              | _____ |
| 14.              | _____ |
| 15.              | _____ |
| 16.              | _____ |

**MBI - General Survey – MBI-GS:** Copyright ©1996 Wilmar B. Schaufeli, Michael P. Leiter, Christina Maslach & Susan E. Jackson.

**MBI - General Survey for Students – MBI-GS (S):** Copyright ©1996, 2016 Wilmar B. Schaufeli, Michael P. Leiter, Christina Maslach & Susan E. Jackson.

All rights reserved in all media. Published by Mind Garden, Inc. [www.mindgarden.com](http://www.mindgarden.com).

**For Publications:**

We understand situations exist where you may want sample test questions for various fair use situations such as academic, scientific or commentary purposes. No items from this instrument may be included in any publication without the prior express written permission from Mind Garden, Inc. Please understand that disclosing more than we have authorized will compromise the integrity and value of the test.

**For Dissertation and Thesis Appendices:**

You may not include an entire instrument in your thesis or dissertation, however you may use the three sample items specified by Mind Garden. Academic committees understand the requirements of copyright and are satisfied with sample items for appendices and tables. For customers needing permission to reproduce the three sample items in a thesis or dissertation, the following page includes the permission letter and reference information needed to satisfy the requirements of an academic committee.

**Online Use of Mind Garden Instruments:**

Online administration and scoring of the Maslach Burnout Inventory is available from Mind Garden, (<https://www.mindgarden.com/117-maslach-burnout-inventory>). Mind Garden provides services to add items and demographics to the Maslach Burnout Inventory. Reports are available for the Maslach Burnout Inventory.

If your research uses an online survey platform other than the Mind Garden Transform survey system, you will need to meet Mind Garden's requirements by following the procedure described at [mindgarden.com/mind-garden-forms/58-remote-online-use-application.html](http://mindgarden.com/mind-garden-forms/58-remote-online-use-application.html).

**All Other Special Reproductions:**

For any other special purposes requiring permissions for reproduction of this instrument, please contact [info@mindgarden.com](mailto:info@mindgarden.com).

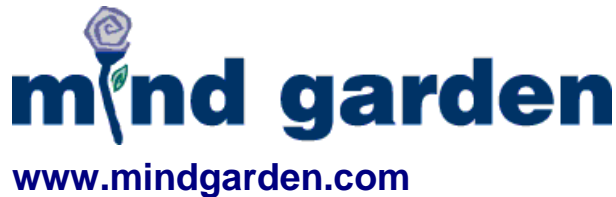

To Whom It May Concern,

The above-named person has made a license purchase from Mind Garden, Inc. and has permission to administer the following copyrighted instrument up to that quantity purchased:

**Maslach Burnout Inventory forms: Human Services Survey, Human Services Survey for Medical Personnel, Educators Survey, General Survey, or General Survey for Students.**

The three sample items only from this instrument as specified below may be included in your thesis or dissertation. Any other use must receive prior written permission from Mind Garden. The entire instrument form may not be included or reproduced at any time in any other published material. Please understand that disclosing more than we have authorized will compromise the integrity and value of the test.

**Citation of the instrument must include the applicable copyright statement listed below. Sample Items:**

**MBI - Human Services Survey - MBI-HSS:**

I feel emotionally drained from my work.  
I have accomplished many worthwhile things in this job.  
I don't really care what happens to some recipients.

Copyright ©1981 Christina Maslach & Susan E. Jackson. All rights reserved in all media.  
Published by Mind Garden, Inc., [www.mindgarden.com](http://www.mindgarden.com)

**MBI - Human Services Survey for Medical Personnel - MBI-HSS (MP):**

I feel emotionally drained from my work.  
I have accomplished many worthwhile things in this job.  
I don't really care what happens to some patients.

Copyright ©1981, 2016 by Christina Maslach & Susan E. Jackson. All rights reserved in all media. Published by Mind Garden, Inc., [www.mindgarden.com](http://www.mindgarden.com)

**MBI - Educators Survey - MBI-ES:**

I feel emotionally drained from my work.  
I have accomplished many worthwhile things in this job.  
I don't really care what happens to some students.

Copyright ©1986 Christina Maslach, Susan E. Jackson & Richard L. Schwab. All rights reserved in all media. Published by Mind Garden, Inc., [www.mindgarden.com](http://www.mindgarden.com)

Cont'd on next page

**MBI - General Survey - MBI-GS:**

I feel emotionally drained from my work.  
In my opinion, I am good at my job.  
I doubt the significance of my work.

Copyright ©1996 Wilmar B. Schaufeli, Michael P. Leiter, Christina Maslach & Susan E. Jackson. All rights reserved in all media. Published by Mind Garden, Inc.,  
[www.mindgarden.com](http://www.mindgarden.com)

**MBI - General Survey for Students - MBI-GS (S):**

I feel emotionally drained by my studies.  
In my opinion, I am a good student.  
I doubt the significance of my studies.

Copyright ©1996, 2016 Wilmar B. Schaufeli, Michael P. Leiter, Christina Maslach & Susan E. Jackson. All rights reserved in all media. Published by Mind Garden, Inc.,  
[www.mindgarden.com](http://www.mindgarden.com)

Sincerely,

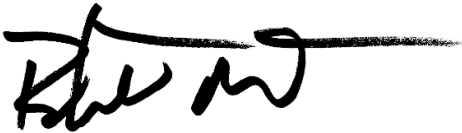A handwritten signature in black ink, appearing to read 'Robert Most', with a long horizontal line extending to the right.

Robert Most  
Mind Garden, Inc.  
[www.mindgarden.com](http://www.mindgarden.com)
